# Supplementary material for: Reserpine maintains photoreceptor survival in retinal ciliopathy by resolving proteostasis imbalance and ciliogenesis defects
Source: eLife. 2023 Mar 28;12:e83205. doi: 10.7554/eLife.83205 (PMC10121224; doi:10.7554/eLife.83205)
Supplement: Figure 4—source data 1. [file elife-83205-fig4-data1.xlsx]

## Sheet: Sheet1
Figure 4-source data 1. Differentially expressing genes in reserpine-treated retinal organoids.
ENSEMBL	logFC	AveExpr	t	P.Value	adj.P.Val	B	name	description
ENSG00000164054	1.46567	6.49076	5.874	4.34857e-06	0.0194671	4.31205	SHISA5	shisa family member 5 [Source:HGNC Symbol;Acc:HGNC:30376]
ENSG00000274276	1.36026	-1.90791	6.02124	3.01411e-06	0.0194671	4.38706	CBSL	cystathionine beta-synthase like [Source:HGNC Symbol;Acc:HGNC:51829]
ENSG00000165699	-1.32148	5.92606	-6.17709	2.04968e-06	0.0194671	5.03202	TSC1	TSC complex subunit 1 [Source:HGNC Symbol;Acc:HGNC:12362]
ENSG00000182718	4.29842	7.4817	5.41395	1.38379e-05	0.0196275	3.21851	ANXA2	annexin A2 [Source:HGNC Symbol;Acc:HGNC:537]
ENSG00000213719	1.88016	6.66387	5.52187	1.05312e-05	0.0196275	3.46518	CLIC1	chloride intracellular channel 1 [Source:HGNC Symbol;Acc:HGNC:2062]
ENSG00000142669	1.37846	5.48888	5.51973	1.05882e-05	0.0196275	3.47721	SH3BGRL3	SH3 domain binding glutamate rich protein like 3 [Source:HGNC Symbol;Acc:HGNC:15568]
ENSG00000173457	1.11061	4.619	5.34466	1.64963e-05	0.0196275	3.06063	PPP1R14B	protein phosphatase 1 regulatory inhibitor subunit 14B [Source:HGNC Symbol;Acc:HGNC:9057]
ENSG00000097096	-1.33712	3.00058	-5.4169	1.37348e-05	0.0196275	2.9658	SYDE2	synapse defective Rho GTPase homolog 2 [Source:HGNC Symbol;Acc:HGNC:25841]
ENSG00000108518	1.36588	7.36471	5.27709	1.95859e-05	0.0202337	2.85592	PFN1	profilin 1 [Source:HGNC Symbol;Acc:HGNC:8881]
ENSG00000150551	3.33067	4.64909	4.92243	4.84157e-05	0.0230922	2.02727	LYPD1	LY6/PLAUR domain containing 1 [Source:HGNC Symbol;Acc:HGNC:28431]
ENSG00000206503	3.00609	6.50599	5.02152	3.75771e-05	0.0230922	2.2676	HLA-A	major histocompatibility complex, class I, A [Source:HGNC Symbol;Acc:HGNC:4931]
ENSG00000166106	2.42353	2.1689	4.89767	5.15835e-05	0.0230922	1.31011	ADAMTS15	ADAM metallopeptidase with thrombospondin type 1 motif 15 [Source:HGNC Symbol;Acc:HGNC:16305]
ENSG00000102265	2.17555	5.291	4.93032	4.74475e-05	0.0230922	2.06571	TIMP1	TIMP metallopeptidase inhibitor 1 [Source:HGNC Symbol;Acc:HGNC:11820]
ENSG00000196839	2.17344	3.17935	5.01121	3.85811e-05	0.0230922	1.9793	ADA	adenosine deaminase [Source:HGNC Symbol;Acc:HGNC:186]
ENSG00000034510	1.36101	8.87739	5.08833	3.16827e-05	0.0230922	2.41106	TMSB10	thymosin beta 10 [Source:HGNC Symbol;Acc:HGNC:11879]
ENSG00000002549	1.30443	5.91103	4.93816	4.65052e-05	0.0230922	2.05231	LAP3	leucine aminopeptidase 3 [Source:HGNC Symbol;Acc:HGNC:18449]
ENSG00000100911	1.20969	5.33241	4.8979	5.15529e-05	0.0230922	1.97716	PSME2	proteasome activator subunit 2 [Source:HGNC Symbol;Acc:HGNC:9569]
ENSG00000174021	1.1213	5.70868	4.90568	5.05361e-05	0.0230922	1.98932	GNG5	G protein subunit gamma 5 [Source:HGNC Symbol;Acc:HGNC:4408]
ENSG00000168807	-1.05857	5.84321	-4.98513	4.12409e-05	0.0230922	2.16996	SNTB2	syntrophin beta 2 [Source:HGNC Symbol;Acc:HGNC:11169]
ENSG00000118733	-1.16223	3.93133	-5.05309	3.46652e-05	0.0230922	2.36315	OLFM3	olfactomedin 3 [Source:HGNC Symbol;Acc:HGNC:17990]
ENSG00000183010	1.00656	4.4051	4.86675	5.5833e-05	0.0234324	1.92748	PYCR1	pyrroline-5-carboxylate reductase 1 [Source:HGNC Symbol;Acc:HGNC:9721]
ENSG00000128617	-4.92306	0.127967	-4.87628	5.44867e-05	0.0234324	0.00482642	OPN1SW	opsin 1, short wave sensitive [Source:HGNC Symbol;Acc:HGNC:1012]
ENSG00000180881	-2.29485	3.42635	-4.82335	6.23982e-05	0.0246058	1.62963	CAPS2	calcyphosine 2 [Source:HGNC Symbol;Acc:HGNC:16471]
ENSG00000006327	3.84665	2.96818	4.65351	9.64397e-05	0.0247002	1.09376	TNFRSF12A	TNF receptor superfamily member 12A [Source:HGNC Symbol;Acc:HGNC:18152]
ENSG00000204525	3.13132	5.4487	4.73367	7.85216e-05	0.0247002	1.61473	HLA-C	major histocompatibility complex, class I, C [Source:HGNC Symbol;Acc:HGNC:4933]
ENSG00000176014	2.81219	4.95706	4.67147	9.20985e-05	0.0247002	1.46651	TUBB6	tubulin beta 6 class V [Source:HGNC Symbol;Acc:HGNC:20776]
ENSG00000004399	2.3401	3.24594	4.75087	7.51336e-05	0.0247002	1.39138	PLXND1	plexin D1 [Source:HGNC Symbol;Acc:HGNC:9107]
ENSG00000157483	1.79468	5.196	4.64934	9.74767e-05	0.0247002	1.40082	MYO1E	myosin IE [Source:HGNC Symbol;Acc:HGNC:7599]
ENSG00000122786	1.78519	6.92097	4.77511	7.06082e-05	0.0247002	1.63783	CALD1	caldesmon 1 [Source:HGNC Symbol;Acc:HGNC:1441]
ENSG00000141756	1.50054	5.78767	4.67068	9.2285e-05	0.0247002	1.42683	FKBP10	FKBP prolyl isomerase 10 [Source:HGNC Symbol;Acc:HGNC:18169]
ENSG00000114115	1.32514	8.00361	4.78265	6.92568e-05	0.0247002	1.64113	RBP1	retinol binding protein 1 [Source:HGNC Symbol;Acc:HGNC:9919]
ENSG00000141522	1.28223	4.37518	4.68933	8.79758e-05	0.0247002	1.50938	ARHGDIA	Rho GDP dissociation inhibitor alpha [Source:HGNC Symbol;Acc:HGNC:678]
ENSG00000135446	1.22977	6.86236	4.67741	9.07051e-05	0.0247002	1.38793	CDK4	cyclin dependent kinase 4 [Source:HGNC Symbol;Acc:HGNC:1773]
ENSG00000105810	1.18354	5.84852	4.67415	9.14682e-05	0.0247002	1.42632	CDK6	cyclin dependent kinase 6 [Source:HGNC Symbol;Acc:HGNC:1777]
ENSG00000164105	1.14183	4.35158	4.6607	9.46771e-05	0.0247002	1.44287	SAP30	Sin3A associated protein 30 [Source:HGNC Symbol;Acc:HGNC:10532]
ENSG00000143190	-1.0035	7.13932	-4.68838	8.819e-05	0.0247002	1.40769	POU2F1	POU class 2 homeobox 1 [Source:HGNC Symbol;Acc:HGNC:9212]
ENSG00000106415	-1.23683	5.31724	-4.74506	7.62608e-05	0.0247002	1.6196	GLCCI1	glucocorticoid induced 1 [Source:HGNC Symbol;Acc:HGNC:18713]
ENSG00000154265	-1.50601	5.3068	-4.66061	9.47e-05	0.0247002	1.41025	ABCA5	ATP binding cassette subfamily A member 5 [Source:HGNC Symbol;Acc:HGNC:35]
ENSG00000132109	2.1578	4.12274	4.63792	0.000100374	0.0249633	1.35517	TRIM21	tripartite motif containing 21 [Source:HGNC Symbol;Acc:HGNC:11312]
ENSG00000149591	3.34004	3.66774	4.59467	0.000112149	0.0261469	1.2635	TAGLN	transgelin [Source:HGNC Symbol;Acc:HGNC:11553]
ENSG00000092010	1.18487	6.4955	4.59097	0.000113216	0.0261469	1.18439	PSME1	proteasome activator subunit 1 [Source:HGNC Symbol;Acc:HGNC:9568]
ENSG00000167601	1.90329	5.02764	4.55571	0.000123932	0.0270237	1.17606	AXL	AXL receptor tyrosine kinase [Source:HGNC Symbol;Acc:HGNC:905]
ENSG00000183688	1.47346	4.22462	4.54689	0.000126768	0.0270237	1.17229	RFLNB	refilin B [Source:HGNC Symbol;Acc:HGNC:28705]
ENSG00000155366	1.20186	6.67624	4.5331	0.00013133	0.0275588	1.03676	RHOC	ras homolog family member C [Source:HGNC Symbol;Acc:HGNC:669]
ENSG00000167767	3.28365	0.369816	4.51482	0.000137634	0.0280669	-0.881379	KRT80	keratin 80 [Source:HGNC Symbol;Acc:HGNC:27056]
ENSG00000131016	2.50014	8.08958	4.50812	0.000140021	0.0280669	0.980851	AKAP12	A-kinase anchoring protein 12 [Source:HGNC Symbol;Acc:HGNC:370]
ENSG00000146674	4.74632	3.91683	4.4775	0.000151457	0.02813	0.985912	IGFBP3	insulin like growth factor binding protein 3 [Source:HGNC Symbol;Acc:HGNC:5472]
ENSG00000115414	3.46588	6.27629	4.47042	0.000154232	0.02813	0.965651	FN1	fibronectin 1 [Source:HGNC Symbol;Acc:HGNC:3778]
ENSG00000005884	3.06867	4.64216	4.48586	0.000148244	0.02813	1.02761	ITGA3	integrin subunit alpha 3 [Source:HGNC Symbol;Acc:HGNC:6139]
ENSG00000064666	1.26867	4.86355	4.48566	0.00014832	0.02813	1.01726	CNN2	calponin 2 [Source:HGNC Symbol;Acc:HGNC:2156]
ENSG00000147509	-1.48837	2.15265	-4.46849	0.000154998	0.02813	0.620087	RGS20	regulator of G protein signaling 20 [Source:HGNC Symbol;Acc:HGNC:14600]
ENSG00000215018	-2.06483	2.65031	-4.47624	0.000151946	0.02813	0.646261	COL28A1	collagen type XXVIII alpha 1 chain [Source:HGNC Symbol;Acc:HGNC:22442]
ENSG00000142871	3.56992	4.08184	4.4174	0.000176687	0.0285145	0.833504	CCN1	cellular communication network factor 1 [Source:HGNC Symbol;Acc:HGNC:2654]
ENSG00000204264	3.03077	3.97342	4.42426	0.000173606	0.0285145	0.853382	PSMB8	proteasome 20S subunit beta 8 [Source:HGNC Symbol;Acc:HGNC:9545]
ENSG00000115415	2.92083	7.49435	4.43381	0.000169409	0.0285145	0.806682	STAT1	signal transducer and activator of transcription 1 [Source:HGNC Symbol;Acc:HGNC:11362]
ENSG00000138496	2.74546	6.04503	4.40913	0.000180471	0.0285145	0.792679	PARP9	poly(ADP-ribose) polymerase family member 9 [Source:HGNC Symbol;Acc:HGNC:24118]
ENSG00000100345	2.15451	6.61271	4.41076	0.000179719	0.0285145	0.75226	MYH9	myosin heavy chain 9 [Source:HGNC Symbol;Acc:HGNC:7579]
ENSG00000134072	1.23323	3.45282	4.41192	0.000179182	0.0285145	0.831007	CAMK1	calcium/calmodulin dependent protein kinase I [Source:HGNC Symbol;Acc:HGNC:1459]
ENSG00000037241	1.02345	5.01497	4.40141	0.000184076	0.0287458	0.781273	RPL26L1	ribosomal protein L26 like 1 [Source:HGNC Symbol;Acc:HGNC:17050]
ENSG00000103202	1.06958	5.2824	4.3837	0.000192624	0.0297349	0.751608	NME4	NME/NM23 nucleoside diphosphate kinase 4 [Source:HGNC Symbol;Acc:HGNC:7852]
ENSG00000186470	1.45345	5.20255	4.37488	0.000197028	0.0300692	0.732803	BTN3A2	butyrophilin subfamily 3 member A2 [Source:HGNC Symbol;Acc:HGNC:1139]
ENSG00000106366	6.8088	4.26329	4.36454	0.000202312	0.0302026	0.485057	SERPINE1	serpin family E member 1 [Source:HGNC Symbol;Acc:HGNC:8583]
ENSG00000234745	3.77064	5.28029	4.34327	0.000213645	0.0302026	0.697264	HLA-B	major histocompatibility complex, class I, B [Source:HGNC Symbol;Acc:HGNC:4932]
ENSG00000189171	1.51871	4.64916	4.34685	0.000211694	0.0302026	0.707085	S100A13	S100 calcium binding protein A13 [Source:HGNC Symbol;Acc:HGNC:10490]
ENSG00000150093	1.627	8.31823	4.32217	0.000225509	0.0309372	0.51997	ITGB1	integrin subunit beta 1 [Source:HGNC Symbol;Acc:HGNC:6153]
ENSG00000152402	-1.28403	5.72445	-4.31778	0.000228055	0.0309372	0.553345	GUCY1A2	guanylate cyclase 1 soluble subunit alpha 2 [Source:HGNC Symbol;Acc:HGNC:4684]
ENSG00000168003	1.43567	5.84832	4.31315	0.000230774	0.030993	0.544352	SLC3A2	solute carrier family 3 member 2 [Source:HGNC Symbol;Acc:HGNC:11026]
ENSG00000165304	3.32773	3.64126	4.29883	0.000239394	0.0315463	0.322211	MELK	maternal embryonic leucine zipper kinase [Source:HGNC Symbol;Acc:HGNC:16870]
ENSG00000117152	3.50686	4.65895	4.25542	0.000267524	0.0318802	0.493259	RGS4	regulator of G protein signaling 4 [Source:HGNC Symbol;Acc:HGNC:10000]
ENSG00000147041	2.54591	1.54791	4.23476	0.000282042	0.0318802	-0.183397	SYTL5	synaptotagmin like 5 [Source:HGNC Symbol;Acc:HGNC:15589]
ENSG00000204592	2.42606	5.66619	4.26263	0.000262633	0.0318802	0.453694	HLA-E	major histocompatibility complex, class I, E [Source:HGNC Symbol;Acc:HGNC:4962]
ENSG00000139734	2.1946	2.5057	4.24682	0.000273472	0.0318802	0.12701	DIAPH3	diaphanous related formin 3 [Source:HGNC Symbol;Acc:HGNC:15480]
ENSG00000140931	1.4494	3.98116	4.24283	0.00027628	0.0318802	0.463724	CMTM3	CKLF like MARVEL transmembrane domain containing 3 [Source:HGNC Symbol;Acc:HGNC:19174]
ENSG00000180198	1.15231	4.8784	4.22806	0.000286918	0.0318802	0.413785	RCC1	regulator of chromosome condensation 1 [Source:HGNC Symbol;Acc:HGNC:1913]
ENSG00000134352	1.11311	6.33644	4.2567	0.000266652	0.0318802	0.368433	IL6ST	interleukin 6 cytokine family signal transducer [Source:HGNC Symbol;Acc:HGNC:6021]
ENSG00000275993	1.34184	4.32286	4.21029	0.000300257	0.0320036	0.380139	SIK1B	salt inducible kinase 1B (putative) [Source:HGNC Symbol;Acc:HGNC:52389]
ENSG00000105954	4.18641	1.30775	4.19708	0.000310566	0.0325852	-0.16732	NPVF	neuropeptide VF precursor [Source:HGNC Symbol;Acc:HGNC:13782]
ENSG00000168685	5.16288	0.869565	4.15706	0.000344005	0.0327	-1.36702	IL7R	interleukin 7 receptor [Source:HGNC Symbol;Acc:HGNC:6024]
ENSG00000213928	2.70556	4.93186	4.15484	0.000345955	0.0327	0.245631	IRF9	interferon regulatory factor 9 [Source:HGNC Symbol;Acc:HGNC:6131]
ENSG00000165891	2.46224	3.6377	4.15354	0.000347105	0.0327	0.170704	E2F7	E2F transcription factor 7 [Source:HGNC Symbol;Acc:HGNC:23820]
ENSG00000173193	2.46218	6.38833	4.17562	0.000328073	0.0327	0.194616	PARP14	poly(ADP-ribose) polymerase family member 14 [Source:HGNC Symbol;Acc:HGNC:29232]
ENSG00000213694	2.25102	5.25779	4.17986	0.000324542	0.0327	0.281688	S1PR3	sphingosine-1-phosphate receptor 3 [Source:HGNC Symbol;Acc:HGNC:3167]
ENSG00000163584	2.03441	4.82921	4.18499	0.00032031	0.0327	0.308732	RPL22L1	ribosomal protein L22 like 1 [Source:HGNC Symbol;Acc:HGNC:27610]
ENSG00000149257	2.02097	5.83572	4.15591	0.000345016	0.0327	0.205844	SERPINH1	serpin family H member 1 [Source:HGNC Symbol;Acc:HGNC:1546]
ENSG00000188613	-1.57337	5.91387	-4.1612	0.000340383	0.0327	0.176006	NANOS1	nanos C2HC-type zinc finger 1 [Source:HGNC Symbol;Acc:HGNC:23044]
ENSG00000198467	2.41026	4.81033	4.13911	0.000360134	0.0331274	0.227658	TPM2	tropomyosin 2 [Source:HGNC Symbol;Acc:HGNC:12011]
ENSG00000159403	2.37506	5.92441	4.12988	0.000368725	0.0333608	0.133782	C1R	complement C1r [Source:HGNC Symbol;Acc:HGNC:1246]
ENSG00000110492	1.67641	6.07109	4.12423	0.000374083	0.0334929	0.0841852	MDK	midkine [Source:HGNC Symbol;Acc:HGNC:6972]
ENSG00000188643	2.36268	4.63226	4.12137	0.000376822	0.0335147	0.182971	S100A16	S100 calcium binding protein A16 [Source:HGNC Symbol;Acc:HGNC:20441]
ENSG00000258659	4.64971	1.00652	4.0711	0.000428369	0.0335883	-2.1923	TRIM34	tripartite motif containing 34 [Source:HGNC Symbol;Acc:HGNC:10063]
ENSG00000161638	2.89958	4.00012	4.07517	0.000423952	0.0335883	0.0562574	ITGA5	integrin subunit alpha 5 [Source:HGNC Symbol;Acc:HGNC:6141]
ENSG00000172216	2.18531	2.31979	4.09954	0.000398403	0.0335883	-0.15899	CEBPB	CCAAT enhancer binding protein beta [Source:HGNC Symbol;Acc:HGNC:1834]
ENSG00000089685	2.11117	4.07508	4.06362	0.000436621	0.0335883	0.0417766	BIRC5	baculoviral IAP repeat containing 5 [Source:HGNC Symbol;Acc:HGNC:593]
ENSG00000067182	1.99026	3.97627	4.06965	0.000429955	0.0335883	0.0518057	TNFRSF1A	TNF receptor superfamily member 1A [Source:HGNC Symbol;Acc:HGNC:11916]
ENSG00000152778	1.79972	5.74626	4.10504	0.000392854	0.0335883	0.0496538	IFIT5	interferon induced protein with tetratricopeptide repeats 5 [Source:HGNC Symbol;Acc:HGNC:13328]
ENSG00000026025	1.6651	10.3472	4.09079	0.000407392	0.0335883	0.0019909	VIM	vimentin [Source:HGNC Symbol;Acc:HGNC:12692]
ENSG00000070404	1.47082	2.74754	4.09043	0.00040777	0.0335883	0.0151673	FSTL3	follistatin like 3 [Source:HGNC Symbol;Acc:HGNC:3973]
ENSG00000129250	1.29914	5.23501	4.06102	0.000439516	0.0335883	-0.0184423	KIF1C	kinesin family member 1C [Source:HGNC Symbol;Acc:HGNC:6317]
ENSG00000080608	1.25578	4.68426	4.10145	0.00039647	0.0335883	0.10832	PUM3	pumilio RNA binding family member 3 [Source:HGNC Symbol;Acc:HGNC:29676]
ENSG00000241553	1.07609	5.71063	4.06562	0.000434395	0.0335883	-0.0539676	ARPC4	actin related protein 2/3 complex subunit 4 [Source:HGNC Symbol;Acc:HGNC:707]
ENSG00000224877	1.00255	3.19729	4.08504	0.000413416	0.0335883	0.0855475	NDUFAF8	NADH:ubiquinone oxidoreductase complex assembly factor 8 [Source:HGNC Symbol;Acc:HGNC:33551]
ENSG00000134909	-1.12049	7.94206	-4.0616	0.000438874	0.0335883	-0.122829	ARHGAP32	Rho GTPase activating protein 32 [Source:HGNC Symbol;Acc:HGNC:17399]
ENSG00000062716	1.22518	6.37035	4.05471	0.000446642	0.0336989	-0.126056	VMP1	vacuole membrane protein 1 [Source:HGNC Symbol;Acc:HGNC:29559]
ENSG00000185745	4.61833	6.18373	4.0425	0.00046076	0.0338142	-0.0306053	IFIT1	interferon induced protein with tetratricopeptide repeats 1 [Source:HGNC Symbol;Acc:HGNC:5407]
ENSG00000111145	3.3577	4.01366	4.045	0.000457827	0.0338142	-0.00459466	ELK3	ETS transcription factor ELK3 [Source:HGNC Symbol;Acc:HGNC:3325]
ENSG00000132274	2.60182	4.99075	4.03352	0.000471418	0.0342224	-0.0380829	TRIM22	tripartite motif containing 22 [Source:HGNC Symbol;Acc:HGNC:16379]
ENSG00000075426	2.5238	4.33036	4.01861	0.000489652	0.0349768	-0.0505952	FOSL2	FOS like 2, AP-1 transcription factor subunit [Source:HGNC Symbol;Acc:HGNC:3798]
ENSG00000144655	2.3531	2.3588	4.01576	0.000493217	0.0349768	-0.328735	CSRNP1	cysteine and serine rich nuclear protein 1 [Source:HGNC Symbol;Acc:HGNC:14300]
ENSG00000243678	1.17677	6.60235	4.00458	0.000507452	0.0351293	-0.257699	NME2	NME/NM23 nucleoside diphosphate kinase 2 [Source:HGNC Symbol;Acc:HGNC:7850]
ENSG00000172936	1.71437	3.80682	3.99919	0.000514458	0.0352508	-0.103396	MYD88	MYD88 innate immune signal transduction adaptor [Source:HGNC Symbol;Acc:HGNC:7562]
ENSG00000131981	3.81287	5.17125	3.99238	0.000523448	0.0356848	-0.115211	LGALS3	galectin 3 [Source:HGNC Symbol;Acc:HGNC:6563]
ENSG00000138061	3.49057	6.86475	3.8736	0.000707688	0.0364002	-0.455731	CYP1B1	cytochrome P450 family 1 subfamily B member 1 [Source:HGNC Symbol;Acc:HGNC:2597]
ENSG00000107201	3.41561	4.88703	3.87509	0.000705037	0.0364002	-0.385469	DDX58	DExD/H-box helicase 58 [Source:HGNC Symbol;Acc:HGNC:19102]
ENSG00000130429	3.19713	2.19892	3.95873	0.000570207	0.0364002	-0.720955	ARPC1B	actin related protein 2/3 complex subunit 1B [Source:HGNC Symbol;Acc:HGNC:704]
ENSG00000168394	3.15513	2.78072	3.90474	0.000653973	0.0364002	-0.405818	TAP1	transporter 1, ATP binding cassette subfamily B member [Source:HGNC Symbol;Acc:HGNC:43]
ENSG00000167553	3.15053	5.78464	3.93565	0.000604641	0.0364002	-0.283593	TUBA1C	tubulin alpha 1c [Source:HGNC Symbol;Acc:HGNC:20768]
ENSG00000168671	3.05266	1.06842	3.89721	0.000666585	0.0364002	-0.866343	UGT3A2	UDP glycosyltransferase family 3 member A2 [Source:HGNC Symbol;Acc:HGNC:27266]
ENSG00000116711	2.9889	3.70353	3.8813	0.000694021	0.0364002	-0.370001	PLA2G4A	phospholipase A2 group IVA [Source:HGNC Symbol;Acc:HGNC:9035]
ENSG00000163840	2.8839	5.41754	3.89072	0.000677646	0.0364002	-0.389812	DTX3L	deltex E3 ubiquitin ligase 3L [Source:HGNC Symbol;Acc:HGNC:30323]
ENSG00000106565	2.58089	4.93091	3.92799	0.00061651	0.0364002	-0.25097	TMEM176B	transmembrane protein 176B [Source:HGNC Symbol;Acc:HGNC:29596]
ENSG00000118508	2.32382	3.7746	3.91525	0.000636772	0.0364002	-0.28651	RAB32	RAB32, member RAS oncogene family [Source:HGNC Symbol;Acc:HGNC:9772]
ENSG00000164111	1.93181	7.5896	3.9031	0.000656705	0.0364002	-0.500984	ANXA5	annexin A5 [Source:HGNC Symbol;Acc:HGNC:543]
ENSG00000140575	1.82801	6.6892	3.92541	0.000620556	0.0364002	-0.432539	IQGAP1	IQ motif containing GTPase activating protein 1 [Source:HGNC Symbol;Acc:HGNC:6110]
ENSG00000065911	1.80639	4.75073	3.86376	0.000725568	0.0364002	-0.425508	MTHFD2	methylenetetrahydrofolate dehydrogenase (NADP+ dependent) 2, methenyltetrahydrofolate cyclohydrolase [Source:HGNC Symbol;Acc:HGNC:7434]
ENSG00000166130	1.66497	3.49348	3.89504	0.000670256	0.0364002	-0.351702	IKBIP	IKBKB interacting protein [Source:HGNC Symbol;Acc:HGNC:26430]
ENSG00000102024	1.66456	7.307	3.87386	0.000707225	0.0364002	-0.575284	PLS3	plastin 3 [Source:HGNC Symbol;Acc:HGNC:9091]
ENSG00000005059	1.61472	4.40416	3.95055	0.000582182	0.0364002	-0.209958	MCUB	mitochondrial calcium uniporter dominant negative subunit beta [Source:HGNC Symbol;Acc:HGNC:26076]
ENSG00000158716	1.52227	2.35911	3.93535	0.000605089	0.0364002	-0.360545	DUSP23	dual specificity phosphatase 23 [Source:HGNC Symbol;Acc:HGNC:21480]
ENSG00000174307	1.44425	3.24622	3.89895	0.000663649	0.0364002	-0.330869	PHLDA3	pleckstrin homology like domain family A member 3 [Source:HGNC Symbol;Acc:HGNC:8934]
ENSG00000196083	1.43696	3.57959	3.93037	0.000612801	0.0364002	-0.244898	IL1RAP	interleukin 1 receptor accessory protein [Source:HGNC Symbol;Acc:HGNC:5995]
ENSG00000198431	1.41621	7.6369	3.90488	0.000653736	0.0364002	-0.504289	TXNRD1	thioredoxin reductase 1 [Source:HGNC Symbol;Acc:HGNC:12437]
ENSG00000166483	1.31622	5.64087	3.95127	0.000581113	0.0364002	-0.320152	WEE1	WEE1 G2 checkpoint kinase [Source:HGNC Symbol;Acc:HGNC:12761]
ENSG00000176890	1.29191	5.89877	3.95177	0.000580374	0.0364002	-0.304466	TYMS	thymidylate synthetase [Source:HGNC Symbol;Acc:HGNC:12441]
ENSG00000147065	1.2669	8.04723	3.87838	0.000699177	0.0364002	-0.568807	MSN	moesin [Source:HGNC Symbol;Acc:HGNC:7373]
ENSG00000060971	1.22422	3.50645	3.85949	0.000733447	0.0364002	-0.40338	ACAA1	acetyl-CoA acyltransferase 1 [Source:HGNC Symbol;Acc:HGNC:82]
ENSG00000259399	1.17392	3.441	3.85713	0.000737848	0.0364002	-0.414425	TGIF2-RAB5IF	TGIF2-RAB5IF readthrough [Source:HGNC Symbol;Acc:HGNC:44664]
ENSG00000130813	1.04664	4.61196	3.85701	0.000738063	0.0364002	-0.476726	SHFL	shiftless antiviral inhibitor of ribosomal frameshifting [Source:HGNC Symbol;Acc:HGNC:25649]
ENSG00000114450	1.00229	4.9922	3.85027	0.000750771	0.0364002	-0.490833	GNB4	G protein subunit beta 4 [Source:HGNC Symbol;Acc:HGNC:20731]
ENSG00000242616	1.00167	4.86235	3.90156	0.000659264	0.0364002	-0.383943	GNG10	G protein subunit gamma 10 [Source:HGNC Symbol;Acc:HGNC:4402]
ENSG00000066697	1.00014	5.15637	3.90876	0.000647345	0.0364002	-0.406856	MSANTD3	Myb/SANT DNA binding domain containing 3 [Source:HGNC Symbol;Acc:HGNC:23370]
ENSG00000178971	-1.15737	5.6819	-3.85549	0.000740906	0.0364002	-0.555658	CTC1	CST telomere replication complex component 1 [Source:HGNC Symbol;Acc:HGNC:26169]
ENSG00000153291	-1.30378	6.11126	-3.91486	0.000637399	0.0364002	-0.425548	SLC25A27	solute carrier family 25 member 27 [Source:HGNC Symbol;Acc:HGNC:21065]
ENSG00000118473	-1.39654	6.91466	-3.96646	0.00055911	0.0364002	-0.350316	SGIP1	SH3GL interacting endocytic adaptor 1 [Source:HGNC Symbol;Acc:HGNC:25412]
ENSG00000176945	-1.50153	4.77679	-3.9104	0.000644656	0.0364002	-0.325475	MUC20	mucin 20, cell surface associated [Source:HGNC Symbol;Acc:HGNC:23282]
ENSG00000144821	-1.60209	3.8062	-3.90447	0.000654417	0.0364002	-0.30346	MYH15	myosin heavy chain 15 [Source:HGNC Symbol;Acc:HGNC:31073]
ENSG00000180113	-1.70095	1.37607	-3.95377	0.000577435	0.0364002	-0.595246	TDRD6	tudor domain containing 6 [Source:HGNC Symbol;Acc:HGNC:21339]
ENSG00000152910	-1.73535	3.45794	-3.85182	0.000747831	0.0364002	-0.432236	CNTNAP4	contactin associated protein family member 4 [Source:HGNC Symbol;Acc:HGNC:18747]
ENSG00000115556	-1.88239	4.85006	-3.89313	0.000673523	0.0364002	-0.411789	PLCD4	phospholipase C delta 4 [Source:HGNC Symbol;Acc:HGNC:9062]
ENSG00000197816	-2.0704	3.57599	-3.89429	0.000671543	0.0364002	-0.365478	CCDC180	coiled-coil domain containing 180 [Source:HGNC Symbol;Acc:HGNC:29303]
ENSG00000175155	-1.17306	6.43648	-3.84722	0.000756599	0.0365508	-0.63939	YPEL2	yippee like 2 [Source:HGNC Symbol;Acc:HGNC:18326]
ENSG00000105355	1.24881	4.25815	3.84549	0.00075991	0.0365792	-0.443155	PLIN3	perilipin 3 [Source:HGNC Symbol;Acc:HGNC:16893]
ENSG00000164949	2.01119	5.00431	3.83997	0.000770599	0.0366991	-0.487775	GEM	GTP binding protein overexpressed in skeletal muscle [Source:HGNC Symbol;Acc:HGNC:4234]
ENSG00000185885	4.62446	6.26617	3.83454	0.000781255	0.0369446	-0.475303	IFITM1	interferon induced transmembrane protein 1 [Source:HGNC Symbol;Acc:HGNC:5412]
ENSG00000165501	1.08956	2.82394	3.83561	0.000779155	0.0369446	-0.494137	LRR1	leucine rich repeat protein 1 [Source:HGNC Symbol;Acc:HGNC:19742]
ENSG00000138646	3.82937	3.99022	3.82339	0.000803606	0.0371337	-0.499106	HERC5	HECT and RLD domain containing E3 ubiquitin protein ligase 5 [Source:HGNC Symbol;Acc:HGNC:24368]
ENSG00000137628	3.47252	4.98776	3.82125	0.000807966	0.0371337	-0.508343	DDX60	DExD/H-box helicase 60 [Source:HGNC Symbol;Acc:HGNC:25942]
ENSG00000104368	2.51517	3.54484	3.8197	0.000811135	0.0371337	-0.506667	PLAT	plasminogen activator, tissue type [Source:HGNC Symbol;Acc:HGNC:9051]
ENSG00000109861	2.36676	5.05092	3.81798	0.000814689	0.0371337	-0.528728	CTSC	cathepsin C [Source:HGNC Symbol;Acc:HGNC:2528]
ENSG00000170312	1.79064	5.33889	3.82958	0.000791126	0.0371337	-0.528411	CDK1	cyclin dependent kinase 1 [Source:HGNC Symbol;Acc:HGNC:1722]
ENSG00000161011	1.60411	7.39057	3.81923	0.000812109	0.0371337	-0.708294	SQSTM1	sequestosome 1 [Source:HGNC Symbol;Acc:HGNC:11280]
ENSG00000126709	6.02567	5.8862	3.80001	0.000852538	0.0376054	-0.545104	IFI6	interferon alpha inducible protein 6 [Source:HGNC Symbol;Acc:HGNC:4054]
ENSG00000078269	3.49947	3.77232	3.79883	0.000855085	0.0376054	-0.570805	SYNJ2	synaptojanin 2 [Source:HGNC Symbol;Acc:HGNC:11504]
ENSG00000120217	2.97241	1.57602	3.80512	0.000841588	0.0376054	-0.994088	CD274	CD274 molecule [Source:HGNC Symbol;Acc:HGNC:17635]
ENSG00000049449	1.08062	7.65988	3.80611	0.000839503	0.0376054	-0.74739	RCN1	reticulocalbin 1 [Source:HGNC Symbol;Acc:HGNC:9934]
ENSG00000140199	-1.12616	7.15952	-3.8014	0.000849542	0.0376054	-0.756867	SLC12A6	solute carrier family 12 member 6 [Source:HGNC Symbol;Acc:HGNC:10914]
ENSG00000120699	1.1098	5.14541	3.79298	0.000867811	0.0378107	-0.657199	EXOSC8	exosome component 8 [Source:HGNC Symbol;Acc:HGNC:17035]
ENSG00000179820	1.54556	4.60137	3.78926	0.000876005	0.0378288	-0.600151	MYADM	myeloid associated differentiation marker [Source:HGNC Symbol;Acc:HGNC:7544]
ENSG00000156587	1.21347	6.05567	3.78991	0.000874556	0.0378288	-0.728965	UBE2L6	ubiquitin conjugating enzyme E2 L6 [Source:HGNC Symbol;Acc:HGNC:12490]
ENSG00000011426	2.32405	4.74599	3.78533	0.000884733	0.0380832	-0.579611	ANLN	anillin actin binding protein [Source:HGNC Symbol;Acc:HGNC:14082]
ENSG00000239264	1.87554	5.67805	3.78001	0.000896709	0.038226	-0.692421	TXNDC5	thioredoxin domain containing 5 [Source:HGNC Symbol;Acc:HGNC:21073]
ENSG00000143545	1.40532	5.91848	3.77685	0.000903874	0.0382935	-0.736414	RAB13	RAB13, member RAS oncogene family [Source:HGNC Symbol;Acc:HGNC:9762]
ENSG00000166923	5.2581	2.18032	3.7703	0.000918962	0.0383171	-0.986186	GREM1	gremlin 1, DAN family BMP antagonist [Source:HGNC Symbol;Acc:HGNC:2001]
ENSG00000055332	1.57216	7.17497	3.7716	0.000915931	0.0383171	-0.821307	EIF2AK2	eukaryotic translation initiation factor 2 alpha kinase 2 [Source:HGNC Symbol;Acc:HGNC:9437]
ENSG00000040275	1.44855	4.89287	3.76563	0.000929842	0.0383171	-0.689405	SPDL1	spindle apparatus coiled-coil protein 1 [Source:HGNC Symbol;Acc:HGNC:26010]
ENSG00000134668	4.3631	0.769452	3.74932	0.000968898	0.0383844	-1.89923	SPOCD1	SPOC domain containing 1 [Source:HGNC Symbol;Acc:HGNC:26338]
ENSG00000148841	1.49942	4.88181	3.75156	0.00096343	0.0383844	-0.680728	ITPRIP	inositol 1,4,5-trisphosphate receptor interacting protein [Source:HGNC Symbol;Acc:HGNC:29370]
ENSG00000162909	1.29212	7.00716	3.75722	0.000949788	0.0383844	-0.860435	CAPN2	calpain 2 [Source:HGNC Symbol;Acc:HGNC:1479]
ENSG00000198856	1.10829	6.43674	3.7499	0.000967486	0.0383844	-0.856147	OSTC	oligosaccharyltransferase complex non-catalytic subunit [Source:HGNC Symbol;Acc:HGNC:24448]
ENSG00000161921	1.56253	2.41744	3.74094	0.000989568	0.039011	-0.717141	CXCL16	C-X-C motif chemokine ligand 16 [Source:HGNC Symbol;Acc:HGNC:16642]
ENSG00000248905	-1.83824	6.75364	-3.73644	0.00100087	0.039011	-0.896824	FMN1	formin 1 [Source:HGNC Symbol;Acc:HGNC:3768]
ENSG00000141682	2.48034	3.80171	3.7322	0.00101162	0.0391131	-0.70057	PMAIP1	phorbol-12-myristate-13-acetate-induced protein 1 [Source:HGNC Symbol;Acc:HGNC:9108]
ENSG00000137124	1.11885	3.93677	3.73124	0.00101405	0.0391131	-0.696924	ALDH1B1	aldehyde dehydrogenase 1 family member B1 [Source:HGNC Symbol;Acc:HGNC:407]
ENSG00000067082	1.03389	5.61503	3.72868	0.00102062	0.0391625	-0.859532	KLF6	Kruppel like factor 6 [Source:HGNC Symbol;Acc:HGNC:2235]
ENSG00000099194	1.35196	9.00112	3.72074	0.00104122	0.0396135	-0.93941	SCD	stearoyl-CoA desaturase [Source:HGNC Symbol;Acc:HGNC:10571]
ENSG00000131351	1.17847	2.68723	3.71654	0.00105231	0.039698	-0.817837	HAUS8	HAUS augmin like complex subunit 8 [Source:HGNC Symbol;Acc:HGNC:30532]
ENSG00000166401	1.93671	2.87239	3.7119	0.00106465	0.0398141	-0.750218	SERPINB8	serpin family B member 8 [Source:HGNC Symbol;Acc:HGNC:8952]
ENSG00000197580	-1.01423	4.27054	-3.71094	0.00106724	0.0398141	-0.774571	BCO2	beta-carotene oxygenase 2 [Source:HGNC Symbol;Acc:HGNC:18503]
ENSG00000162194	-1.48463	4.5325	-3.71215	0.00106399	0.0398141	-0.79721	LBHD1	LBH domain containing 1 [Source:HGNC Symbol;Acc:HGNC:28351]
ENSG00000140545	1.47534	4.25609	3.70702	0.00107782	0.0399865	-0.795076	MFGE8	milk fat globule EGF and factor V/VIII domain containing [Source:HGNC Symbol;Acc:HGNC:7036]
ENSG00000158683	-1.65096	0.629355	-3.6995	0.00109841	0.0401953	-1.63094	PKD1L1	polycystin 1 like 1, transient receptor potential channel interacting [Source:HGNC Symbol;Acc:HGNC:18053]
ENSG00000142227	1.74942	4.16888	3.69837	0.00110151	0.0401993	-0.771878	EMP3	epithelial membrane protein 3 [Source:HGNC Symbol;Acc:HGNC:3335]
ENSG00000127423	2.48327	0.845733	3.69427	0.00111294	0.0402368	-1.68331	AUNIP	aurora kinase A and ninein interacting protein [Source:HGNC Symbol;Acc:HGNC:28363]
ENSG00000142089	4.57498	5.73	3.63391	0.00129508	0.0404959	-0.907993	IFITM3	interferon induced transmembrane protein 3 [Source:HGNC Symbol;Acc:HGNC:5414]
ENSG00000197956	3.62898	5.3137	3.66847	0.00118749	0.0404959	-0.867874	S100A6	S100 calcium binding protein A6 [Source:HGNC Symbol;Acc:HGNC:10496]
ENSG00000115267	2.98585	3.57565	3.63752	0.00128341	0.0404959	-0.912122	IFIH1	interferon induced with helicase C domain 1 [Source:HGNC Symbol;Acc:HGNC:18873]
ENSG00000115363	2.66743	2.26225	3.65515	0.00122789	0.0404959	-1.08971	EVA1A	eva-1 homolog A, regulator of programmed cell death [Source:HGNC Symbol;Acc:HGNC:25816]
ENSG00000113070	2.63816	3.04634	3.68879	0.00112839	0.0404959	-0.786056	HBEGF	heparin binding EGF like growth factor [Source:HGNC Symbol;Acc:HGNC:3059]
ENSG00000168899	2.34655	1.69	3.63266	0.00129914	0.0404959	-1.31363	VAMP5	vesicle associated membrane protein 5 [Source:HGNC Symbol;Acc:HGNC:12646]
ENSG00000105939	1.91411	5.4963	3.63621	0.00128762	0.0404959	-1.03884	ZC3HAV1	zinc finger CCCH-type containing, antiviral 1 [Source:HGNC Symbol;Acc:HGNC:23721]
ENSG00000187498	1.87807	5.9781	3.63639	0.00128704	0.0404959	-1.04462	COL4A1	collagen type IV alpha 1 chain [Source:HGNC Symbol;Acc:HGNC:2202]
ENSG00000157227	1.82394	6.03821	3.63454	0.00129302	0.0404959	-1.07413	MMP14	matrix metallopeptidase 14 [Source:HGNC Symbol;Acc:HGNC:7160]
ENSG00000166451	1.80339	3.32158	3.63975	0.00127627	0.0404959	-0.927085	CENPN	centromere protein N [Source:HGNC Symbol;Acc:HGNC:30873]
ENSG00000018408	1.7997	6.21394	3.63313	0.00129762	0.0404959	-1.0668	WWTR1	WW domain containing transcription regulator 1 [Source:HGNC Symbol;Acc:HGNC:24042]
ENSG00000113739	1.69	5.9132	3.62975	0.00130865	0.0404959	-1.07767	STC2	stanniocalcin 2 [Source:HGNC Symbol;Acc:HGNC:11374]
ENSG00000168077	1.5541	5.11668	3.65952	0.0012145	0.0404959	-0.946688	SCARA3	scavenger receptor class A member 3 [Source:HGNC Symbol;Acc:HGNC:19000]
ENSG00000136830	1.40169	4.06006	3.66281	0.0012045	0.0404959	-0.856777	NIBAN2	niban apoptosis regulator 2 [Source:HGNC Symbol;Acc:HGNC:25282]
ENSG00000105329	1.37076	2.6187	3.68556	0.00113758	0.0404959	-0.828013	TGFB1	transforming growth factor beta 1 [Source:HGNC Symbol;Acc:HGNC:11766]
ENSG00000136810	1.36172	6.74763	3.63677	0.00128582	0.0404959	-1.14054	TXN	thioredoxin [Source:HGNC Symbol;Acc:HGNC:12435]
ENSG00000152377	1.35782	6.66746	3.68181	0.00114837	0.0404959	-1.03007	SPOCK1	SPARC (osteonectin), cwcv and kazal like domains proteoglycan 1 [Source:HGNC Symbol;Acc:HGNC:11251]
ENSG00000112186	1.28192	4.61221	3.66576	0.00119559	0.0404959	-0.894613	CAP2	cyclase associated actin cytoskeleton regulatory protein 2 [Source:HGNC Symbol;Acc:HGNC:20039]
ENSG00000164733	1.17272	7.24199	3.68137	0.00114963	0.0404959	-1.04426	CTSB	cathepsin B [Source:HGNC Symbol;Acc:HGNC:2527]
ENSG00000139926	1.16924	4.05942	3.67351	0.00117256	0.0404959	-0.825935	FRMD6	FERM domain containing 6 [Source:HGNC Symbol;Acc:HGNC:19839]
ENSG00000142178	1.13448	3.85162	3.67173	0.00117781	0.0404959	-0.851779	SIK1	salt inducible kinase 1 [Source:HGNC Symbol;Acc:HGNC:11142]
ENSG00000148834	1.10104	5.55967	3.67186	0.00117743	0.0404959	-0.995372	GSTO1	glutathione S-transferase omega 1 [Source:HGNC Symbol;Acc:HGNC:13312]
ENSG00000165868	-1.01514	5.10848	-3.6419	0.00126937	0.0404959	-1.0071	HSPA12A	heat shock protein family A (Hsp70) member 12A [Source:HGNC Symbol;Acc:HGNC:19022]
ENSG00000119772	-1.0168	7.5747	-3.67473	0.00116897	0.0404959	-1.06077	DNMT3A	DNA methyltransferase 3 alpha [Source:HGNC Symbol;Acc:HGNC:2978]
ENSG00000107864	-1.08578	4.07969	-3.63999	0.00127548	0.0404959	-0.935345	CPEB3	cytoplasmic polyadenylation element binding protein 3 [Source:HGNC Symbol;Acc:HGNC:21746]
ENSG00000196689	-1.1075	4.39607	-3.64109	0.00127195	0.0404959	-0.936851	TRPV1	transient receptor potential cation channel subfamily V member 1 [Source:HGNC Symbol;Acc:HGNC:12716]
ENSG00000048342	-1.18561	7.43002	-3.66213	0.00120655	0.0404959	-1.0887	CC2D2A	coiled-coil and C2 domain containing 2A [Source:HGNC Symbol;Acc:HGNC:29253]
ENSG00000036672	-1.54661	5.41773	-3.6428	0.00126653	0.0404959	-1.04153	USP2	ubiquitin specific peptidase 2 [Source:HGNC Symbol;Acc:HGNC:12618]
ENSG00000197635	-1.88077	4.97991	-3.65822	0.00121845	0.0404959	-0.962994	DPP4	dipeptidyl peptidase 4 [Source:HGNC Symbol;Acc:HGNC:3009]
ENSG00000203760	2.552	2.53568	3.62557	0.00132242	0.040641	-1.16762	CENPW	centromere protein W [Source:HGNC Symbol;Acc:HGNC:21488]
ENSG00000177409	1.88494	3.91954	3.62203	0.00133422	0.0408621	-0.931352	SAMD9L	sterile alpha motif domain containing 9 like [Source:HGNC Symbol;Acc:HGNC:1349]
ENSG00000130589	1.80917	2.92958	3.61983	0.00134158	0.0408621	-0.948939	HELZ2	helicase with zinc finger 2 [Source:HGNC Symbol;Acc:HGNC:30021]
ENSG00000173085	1.24992	3.10258	3.6192	0.00134372	0.0408621	-0.945718	COQ2	coenzyme Q2, polyprenyltransferase [Source:HGNC Symbol;Acc:HGNC:25223]
ENSG00000134013	3.43726	3.44766	3.60927	0.00137755	0.0411227	-0.968542	LOXL2	lysyl oxidase like 2 [Source:HGNC Symbol;Acc:HGNC:6666]
ENSG00000163565	2.72909	5.58753	3.59842	0.00141548	0.0411227	-1.08168	IFI16	interferon gamma inducible protein 16 [Source:HGNC Symbol;Acc:HGNC:5395]
ENSG00000185022	1.49204	3.09256	3.6057	0.00138992	0.0411227	-0.970225	MAFF	MAF bZIP transcription factor F [Source:HGNC Symbol;Acc:HGNC:6780]
ENSG00000105854	1.23925	5.86668	3.60036	0.00140861	0.0411227	-1.1481	PON2	paraoxonase 2 [Source:HGNC Symbol;Acc:HGNC:9205]
ENSG00000079931	1.23018	5.80428	3.59801	0.00141692	0.0411227	-1.18338	MOXD1	monooxygenase DBH like 1 [Source:HGNC Symbol;Acc:HGNC:21063]
ENSG00000147202	1.06217	4.18142	3.60513	0.00139189	0.0411227	-0.997366	DIAPH2	diaphanous related formin 2 [Source:HGNC Symbol;Acc:HGNC:2877]
ENSG00000172260	-1.1411	4.95668	-3.60544	0.00139083	0.0411227	-1.07277	NEGR1	neuronal growth regulator 1 [Source:HGNC Symbol;Acc:HGNC:17302]
ENSG00000085563	3.85769	2.83524	3.59297	0.00143491	0.0411933	-1.18644	ABCB1	ATP binding cassette subfamily B member 1 [Source:HGNC Symbol;Acc:HGNC:40]
ENSG00000081479	-1.05954	8.17452	-3.5923	0.0014373	0.0411933	-1.25055	LRP2	LDL receptor related protein 2 [Source:HGNC Symbol;Acc:HGNC:6694]
ENSG00000185880	1.90425	0.961745	3.59094	0.00144221	0.0412103	-1.61559	TRIM69	tripartite motif containing 69 [Source:HGNC Symbol;Acc:HGNC:17857]
ENSG00000196136	4.10187	7.26145	3.58458	0.00146535	0.0413381	-1.1543	SERPINA3	serpin family A member 3 [Source:HGNC Symbol;Acc:HGNC:16]
ENSG00000196924	1.45623	7.30432	3.58738	0.00145512	0.0413381	-1.26057	FLNA	filamin A [Source:HGNC Symbol;Acc:HGNC:3754]
ENSG00000112378	1.39915	5.47663	3.58379	0.00146822	0.0413381	-1.20199	PERP	p53 apoptosis effector related to PMP22 [Source:HGNC Symbol;Acc:HGNC:17637]
ENSG00000150275	-1.50382	4.35749	-3.58678	0.00145729	0.0413381	-1.02393	PCDH15	protocadherin related 15 [Source:HGNC Symbol;Acc:HGNC:14674]
ENSG00000184979	3.26684	3.25843	3.57788	0.0014901	0.0415302	-1.05585	USP18	ubiquitin specific peptidase 18 [Source:HGNC Symbol;Acc:HGNC:12616]
ENSG00000115107	3.03917	2.38067	3.58042	0.00148066	0.0415302	-1.16358	STEAP3	STEAP3 metalloreductase [Source:HGNC Symbol;Acc:HGNC:24592]
ENSG00000143318	-1.15085	2.86055	-3.5789	0.00148631	0.0415302	-1.06318	CASQ1	calsequestrin 1 [Source:HGNC Symbol;Acc:HGNC:1512]
ENSG00000168781	-1.05176	6.37013	-3.5698	0.00152049	0.0416272	-1.28946	PPIP5K1	diphosphoinositol pentakisphosphate kinase 1 [Source:HGNC Symbol;Acc:HGNC:29023]
ENSG00000115541	1.15961	6.94909	3.56247	0.00154858	0.0417995	-1.32318	HSPE1	heat shock protein family E (Hsp10) member 1 [Source:HGNC Symbol;Acc:HGNC:5269]
ENSG00000206053	1.03489	6.3023	3.56079	0.0015551	0.0418536	-1.28792	JPT2	Jupiter microtubule associated homolog 2 [Source:HGNC Symbol;Acc:HGNC:14137]
ENSG00000134057	1.53726	5.68157	3.55851	0.00156396	0.042008	-1.21991	CCNB1	cyclin B1 [Source:HGNC Symbol;Acc:HGNC:1579]
ENSG00000263528	2.92846	0.567236	3.55295	0.00158582	0.0422322	-2.32349	IKBKE	inhibitor of nuclear factor kappa B kinase subunit epsilon [Source:HGNC Symbol;Acc:HGNC:14552]
ENSG00000171241	1.92213	2.69676	3.54981	0.0015983	0.0423376	-1.17174	SHCBP1	SHC binding and spindle associated 1 [Source:HGNC Symbol;Acc:HGNC:29547]
ENSG00000057019	1.66339	8.90493	3.54498	0.00161769	0.0423675	-1.33357	DCBLD2	discoidin, CUB and LCCL domain containing 2 [Source:HGNC Symbol;Acc:HGNC:24627]
ENSG00000166073	1.56338	3.18274	3.54526	0.00161656	0.0423675	-1.09469	GPR176	G protein-coupled receptor 176 [Source:HGNC Symbol;Acc:HGNC:32370]
ENSG00000160124	1.19926	4.07342	3.5471	0.00160913	0.0423675	-1.13762	MIX23	mitochondrial matrix import factor 23 [Source:HGNC Symbol;Acc:HGNC:31136]
ENSG00000122507	-1.11381	4.76053	-3.53916	0.00164134	0.0424614	-1.23808	BBS9	Bardet-Biedl syndrome 9 [Source:HGNC Symbol;Acc:HGNC:30000]
ENSG00000090339	4.46898	2.80087	3.53721	0.00164933	0.0425154	-1.44111	ICAM1	intercellular adhesion molecule 1 [Source:HGNC Symbol;Acc:HGNC:5344]
ENSG00000085063	1.11752	8.00129	3.53439	0.00166096	0.0426816	-1.38471	CD59	CD59 molecule (CD59 blood group) [Source:HGNC Symbol;Acc:HGNC:1689]
ENSG00000144824	1.53256	3.98715	3.52975	0.0016803	0.0426824	-1.12897	PHLDB2	pleckstrin homology like domain family B member 2 [Source:HGNC Symbol;Acc:HGNC:29573]
ENSG00000140650	1.15841	3.05037	3.52784	0.00168829	0.0426824	-1.13281	PMM2	phosphomannomutase 2 [Source:HGNC Symbol;Acc:HGNC:9115]
ENSG00000240038	-1.5452	5.22916	-3.53028	0.00167809	0.0426824	-1.25818	AMY2B	amylase alpha 2B [Source:HGNC Symbol;Acc:HGNC:478]
ENSG00000240065	4.97088	1.07891	3.52253	0.00171082	0.0427865	-2.05145	PSMB9	proteasome 20S subunit beta 9 [Source:HGNC Symbol;Acc:HGNC:9546]
ENSG00000135074	-1.10287	6.15411	-3.52282	0.00170955	0.0427865	-1.37424	ADAM19	ADAM metallopeptidase domain 19 [Source:HGNC Symbol;Acc:HGNC:197]
ENSG00000125740	2.60185	0.412029	3.51907	0.00172561	0.0429165	-1.64403	FOSB	FosB proto-oncogene, AP-1 transcription factor subunit [Source:HGNC Symbol;Acc:HGNC:3797]
ENSG00000145685	1.26824	5.98514	3.51942	0.00172413	0.0429165	-1.36487	LHFPL2	LHFPL tetraspan subfamily member 2 [Source:HGNC Symbol;Acc:HGNC:6588]
ENSG00000079101	-1.15501	4.33401	-3.51912	0.00172541	0.0429165	-1.29316	CLUL1	clusterin like 1 [Source:HGNC Symbol;Acc:HGNC:2096]
ENSG00000169432	2.33189	3.16161	3.51616	0.00173815	0.0429407	-1.1689	SCN9A	sodium voltage-gated channel alpha subunit 9 [Source:HGNC Symbol;Acc:HGNC:10597]
ENSG00000164294	2.28931	4.94222	3.50927	0.00176824	0.0429407	-1.22508	GPX8	glutathione peroxidase 8 (putative) [Source:HGNC Symbol;Acc:HGNC:33100]
ENSG00000244509	2.06145	2.89997	3.50491	0.00178755	0.0429407	-1.22213	APOBEC3C	apolipoprotein B mRNA editing enzyme catalytic subunit 3C [Source:HGNC Symbol;Acc:HGNC:17353]
ENSG00000101911	1.96023	3.45004	3.50483	0.0017879	0.0429407	-1.20009	PRPS2	phosphoribosyl pyrophosphate synthetase 2 [Source:HGNC Symbol;Acc:HGNC:9465]
ENSG00000168461	1.80064	6.20739	3.50777	0.00177488	0.0429407	-1.37826	RAB31	RAB31, member RAS oncogene family [Source:HGNC Symbol;Acc:HGNC:9771]
ENSG00000108828	1.23739	6.43009	3.50638	0.00178103	0.0429407	-1.41359	VAT1	vesicle amine transport 1 [Source:HGNC Symbol;Acc:HGNC:16919]
ENSG00000205323	1.01742	6.59309	3.50424	0.00179053	0.0429407	-1.45213	SARNP	SAP domain containing ribonucleoprotein [Source:HGNC Symbol;Acc:HGNC:24432]
ENSG00000135968	-1.02799	3.95899	-3.50938	0.00176774	0.0429407	-1.19334	GCC2	GRIP and coiled-coil domain containing 2 [Source:HGNC Symbol;Acc:HGNC:23218]
ENSG00000184216	1.11489	4.08787	3.5018	0.00180141	0.0429715	-1.21534	IRAK1	interleukin 1 receptor associated kinase 1 [Source:HGNC Symbol;Acc:HGNC:6112]
ENSG00000175544	-2.42198	2.01492	-3.50017	0.00180877	0.0429942	-1.35795	CABP4	calcium binding protein 4 [Source:HGNC Symbol;Acc:HGNC:1386]
ENSG00000142945	1.75177	4.31104	3.49693	0.00182339	0.043189	-1.21165	KIF2C	kinesin family member 2C [Source:HGNC Symbol;Acc:HGNC:6393]
ENSG00000171017	3.1835	0.328082	3.48751	0.00186662	0.0433879	-2.45156	LRRC8E	leucine rich repeat containing 8 VRAC subunit E [Source:HGNC Symbol;Acc:HGNC:26272]
ENSG00000071539	1.90101	3.21826	3.48749	0.0018667	0.0433879	-1.23712	TRIP13	thyroid hormone receptor interactor 13 [Source:HGNC Symbol;Acc:HGNC:12307]
ENSG00000259030	-1.02504	3.02021	-3.48893	0.00186003	0.0433879	-1.22253	FPGT-TNNI3K	FPGT-TNNI3K readthrough [Source:HGNC Symbol;Acc:HGNC:42952]
ENSG00000177469	3.56468	3.81065	3.48099	0.00189709	0.0434052	-1.23331	CAVIN1	caveolae associated protein 1 [Source:HGNC Symbol;Acc:HGNC:9688]
ENSG00000166710	2.78984	2.63616	3.48106	0.00189675	0.0434052	-1.43393	B2M	beta-2-microglobulin [Source:HGNC Symbol;Acc:HGNC:914]
ENSG00000113140	1.73588	7.31032	3.48145	0.00189493	0.0434052	-1.49658	SPARC	secreted protein acidic and cysteine rich [Source:HGNC Symbol;Acc:HGNC:11219]
ENSG00000106333	3.1899	0.520627	3.47874	0.00190772	0.0434249	-2.638	PCOLCE	procollagen C-endopeptidase enhancer [Source:HGNC Symbol;Acc:HGNC:8738]
ENSG00000137331	3.0323	3.15289	3.47775	0.00191246	0.0434591	-1.29595	IER3	immediate early response 3 [Source:HGNC Symbol;Acc:HGNC:5392]
ENSG00000148848	3.53306	2.29654	3.47294	0.00193543	0.0437836	-1.53296	ADAM12	ADAM metallopeptidase domain 12 [Source:HGNC Symbol;Acc:HGNC:190]
ENSG00000128591	1.95587	5.6555	3.47324	0.00193398	0.0437836	-1.39436	FLNC	filamin C [Source:HGNC Symbol;Acc:HGNC:3756]
ENSG00000136783	1.3189	4.21808	3.47257	0.00193718	0.0437836	-1.30942	NIPSNAP3A	nipsnap homolog 3A [Source:HGNC Symbol;Acc:HGNC:23619]
ENSG00000081059	1.80162	3.96474	3.46213	0.00198809	0.0440086	-1.28054	TCF7	transcription factor 7 [Source:HGNC Symbol;Acc:HGNC:11639]
ENSG00000135862	1.72501	7.15044	3.46308	0.0019834	0.0440086	-1.54208	LAMC1	laminin subunit gamma 1 [Source:HGNC Symbol;Acc:HGNC:6492]
ENSG00000130340	1.40865	5.10978	3.46352	0.00198124	0.0440086	-1.39251	SNX9	sorting nexin 9 [Source:HGNC Symbol;Acc:HGNC:14973]
ENSG00000148484	1.00101	4.63768	3.45928	0.00200218	0.0440086	-1.37534	RSU1	Ras suppressor protein 1 [Source:HGNC Symbol;Acc:HGNC:10464]
ENSG00000136928	-1.63568	4.61098	-3.46626	0.0019678	0.0440086	-1.3613	GABBR2	gamma-aminobutyric acid type B receptor subunit 2 [Source:HGNC Symbol;Acc:HGNC:4507]
ENSG00000107562	2.84546	3.88485	3.45683	0.00201441	0.044205	-1.28716	CXCL12	C-X-C motif chemokine ligand 12 [Source:HGNC Symbol;Acc:HGNC:10672]
ENSG00000113296	-1.03025	4.7325	-3.45294	0.00203391	0.0444153	-1.39485	THBS4	thrombospondin 4 [Source:HGNC Symbol;Acc:HGNC:11788]
ENSG00000145431	1.23634	2.43094	3.45102	0.00204363	0.0444828	-1.34128	PDGFC	platelet derived growth factor C [Source:HGNC Symbol;Acc:HGNC:8801]
ENSG00000181104	1.24073	5.7286	3.44918	0.00205297	0.0445291	-1.50831	F2R	coagulation factor II thrombin receptor [Source:HGNC Symbol;Acc:HGNC:3537]
ENSG00000162627	1.23695	4.80239	3.448	0.00205902	0.0445291	-1.41372	SNX7	sorting nexin 7 [Source:HGNC Symbol;Acc:HGNC:14971]
ENSG00000114124	-2.45192	0.757827	-3.44814	0.00205828	0.0445291	-1.55636	GRK7	G protein-coupled receptor kinase 7 [Source:HGNC Symbol;Acc:HGNC:17031]
ENSG00000069399	1.88343	1.16485	3.44707	0.00206378	0.0445604	-1.63989	BCL3	BCL3 transcription coactivator [Source:HGNC Symbol;Acc:HGNC:998]
ENSG00000048162	1.01223	3.09716	3.44314	0.00208399	0.0447808	-1.31251	NOP16	NOP16 nucleolar protein [Source:HGNC Symbol;Acc:HGNC:26934]
ENSG00000177606	1.00049	5.78631	3.44347	0.00208225	0.0447808	-1.53172	JUN	Jun proto-oncogene, AP-1 transcription factor subunit [Source:HGNC Symbol;Acc:HGNC:6204]
ENSG00000140105	1.41992	7.123	3.43521	0.00212536	0.0450925	-1.62037	WARS1	tryptophanyl-tRNA synthetase 1 [Source:HGNC Symbol;Acc:HGNC:12729]
ENSG00000117394	1.1763	7.72704	3.437	0.00211592	0.0450925	-1.61948	SLC2A1	solute carrier family 2 member 1 [Source:HGNC Symbol;Acc:HGNC:11005]
ENSG00000155846	-1.13847	3.14763	-3.43566	0.00212294	0.0450925	-1.32917	PPARGC1B	PPARG coactivator 1 beta [Source:HGNC Symbol;Acc:HGNC:30022]
ENSG00000196754	3.37419	0.752997	3.42807	0.00216324	0.0454517	-1.88454	S100A2	S100 calcium binding protein A2 [Source:HGNC Symbol;Acc:HGNC:10492]
ENSG00000136167	3.31022	1.18876	3.428	0.0021636	0.0454517	-1.82282	LCP1	lymphocyte cytosolic protein 1 [Source:HGNC Symbol;Acc:HGNC:6528]
ENSG00000138642	3.2192	3.61837	3.42557	0.0021767	0.0454517	-1.35115	HERC6	HECT and RLD domain containing E3 ubiquitin protein ligase family member 6 [Source:HGNC Symbol;Acc:HGNC:26072]
ENSG00000116133	2.15995	5.8404	3.42549	0.00217712	0.0454517	-1.49966	DHCR24	24-dehydrocholesterol reductase [Source:HGNC Symbol;Acc:HGNC:2859]
ENSG00000121101	-1.36945	3.53467	-3.42745	0.0021666	0.0454517	-1.36151	TEX14	testis expressed 14, intercellular bridge forming factor [Source:HGNC Symbol;Acc:HGNC:11737]
ENSG00000164687	1.7009	6.20601	3.41688	0.00222404	0.0461481	-1.62144	FABP5	fatty acid binding protein 5 [Source:HGNC Symbol;Acc:HGNC:3560]
ENSG00000100526	1.48128	3.48575	3.41364	0.00224194	0.0461481	-1.37497	CDKN3	cyclin dependent kinase inhibitor 3 [Source:HGNC Symbol;Acc:HGNC:1791]
ENSG00000124782	-1.00158	5.82765	-3.41357	0.00224233	0.0461481	-1.6057	RREB1	ras responsive element binding protein 1 [Source:HGNC Symbol;Acc:HGNC:10449]
ENSG00000196482	-1.06303	5.95084	-3.41527	0.0022329	0.0461481	-1.62991	ESRRG	estrogen related receptor gamma [Source:HGNC Symbol;Acc:HGNC:3474]
ENSG00000164611	1.4876	5.4377	3.41142	0.00225429	0.0462538	-1.52545	PTTG1	PTTG1 regulator of sister chromatid separation, securin [Source:HGNC Symbol;Acc:HGNC:9690]
ENSG00000130559	-1.03771	8.04441	-3.41087	0.00225735	0.0462538	-1.67146	CAMSAP1	calmodulin regulated spectrin associated protein 1 [Source:HGNC Symbol;Acc:HGNC:19946]
ENSG00000183423	-1.62606	4.96856	-3.4056	0.00228693	0.0466769	-1.53958	LRIT3	leucine rich repeat, Ig-like and transmembrane domains 3 [Source:HGNC Symbol;Acc:HGNC:24783]
ENSG00000152804	4.69461	-1.62032	3.4038	0.00229714	0.0467433	-3.25362	HHEX	hematopoietically expressed homeobox [Source:HGNC Symbol;Acc:HGNC:4901]
ENSG00000167772	4.87539	1.91593	3.38889	0.00238338	0.0477807	-1.97263	ANGPTL4	angiopoietin like 4 [Source:HGNC Symbol;Acc:HGNC:16039]
ENSG00000164087	1.45446	2.52637	3.38522	0.00240505	0.0477807	-1.53399	POC1A	POC1 centriolar protein A [Source:HGNC Symbol;Acc:HGNC:24488]
ENSG00000128595	1.05763	8.02488	3.38641	0.00239802	0.0477807	-1.73594	CALU	calumenin [Source:HGNC Symbol;Acc:HGNC:1458]
ENSG00000167131	-2.52717	1.65182	-3.3888	0.00238391	0.0477807	-1.51109	CCDC103	coiled-coil domain containing 103 [Source:HGNC Symbol;Acc:HGNC:32700]
ENSG00000131389	-2.94409	5.21569	-3.3918	0.00236627	0.0477807	-1.51453	SLC6A6	solute carrier family 6 member 6 [Source:HGNC Symbol;Acc:HGNC:11052]
ENSG00000175161	-1.25707	7.25251	-3.38451	0.00240928	0.0477942	-1.73992	CADM2	cell adhesion molecule 2 [Source:HGNC Symbol;Acc:HGNC:29849]
ENSG00000149294	-1.00545	9.54017	-3.38352	0.00241517	0.0478404	-1.69825	NCAM1	neural cell adhesion molecule 1 [Source:HGNC Symbol;Acc:HGNC:7656]
ENSG00000187608	4.61814	1.89435	3.38065	0.00243237	0.0478797	-1.90799	ISG15	ISG15 ubiquitin like modifier [Source:HGNC Symbol;Acc:HGNC:4053]
ENSG00000135899	2.23059	3.03161	3.38156	0.00242691	0.0478797	-1.46206	SP110	SP110 nuclear body protein [Source:HGNC Symbol;Acc:HGNC:5401]
ENSG00000153250	1.81572	3.10061	3.37901	0.00244219	0.0479332	-1.44777	RBMS1	RNA binding motif single stranded interacting protein 1 [Source:HGNC Symbol;Acc:HGNC:9907]
ENSG00000112699	1.49481	2.55893	3.37857	0.00244484	0.0479332	-1.48446	GMDS	GDP-mannose 4,6-dehydratase [Source:HGNC Symbol;Acc:HGNC:4369]
ENSG00000144406	-1.39076	6.67681	-3.37673	0.00245597	0.0480811	-1.74525	UNC80	unc-80 homolog, NALCN channel complex subunit [Source:HGNC Symbol;Acc:HGNC:26582]
ENSG00000173452	-1.6891	1.92011	-3.37602	0.00246029	0.0480956	-1.53338	TMEM196	transmembrane protein 196 [Source:HGNC Symbol;Acc:HGNC:22431]
ENSG00000101160	2.00272	3.41638	3.37394	0.00247297	0.0481334	-1.46129	CTSZ	cathepsin Z [Source:HGNC Symbol;Acc:HGNC:2547]
ENSG00000121236	2.32096	1.56993	3.37171	0.00248663	0.0481852	-1.86746	TRIM6	tripartite motif containing 6 [Source:HGNC Symbol;Acc:HGNC:16277]
ENSG00000134871	1.22543	5.78131	3.3723	0.00248297	0.0481852	-1.64959	COL4A2	collagen type IV alpha 2 chain [Source:HGNC Symbol;Acc:HGNC:2203]
ENSG00000146950	-1.14175	5.71043	-3.37116	0.00248999	0.0481852	-1.71055	SHROOM2	shroom family member 2 [Source:HGNC Symbol;Acc:HGNC:630]
ENSG00000085514	-1.78469	1.02077	-3.37282	0.00247979	0.0481852	-2.03152	PILRA	paired immunoglobin like type 2 receptor alpha [Source:HGNC Symbol;Acc:HGNC:20396]
ENSG00000261873	-2.57771	0.160994	-3.36987	0.00249789	0.0482687	-2.10722	SMIM36	small integral membrane protein 36 [Source:HGNC Symbol;Acc:HGNC:53654]
ENSG00000108679	2.24341	4.71695	3.36893	0.00250373	0.048312	-1.53556	LGALS3BP	galectin 3 binding protein [Source:HGNC Symbol;Acc:HGNC:6564]
ENSG00000163513	3.23434	2.5387	3.36234	0.00254473	0.0486537	-1.62668	TGFBR2	transforming growth factor beta receptor 2 [Source:HGNC Symbol;Acc:HGNC:11773]
ENSG00000102007	2.13165	3.50849	3.3612	0.00255186	0.0486537	-1.48751	PLP2	proteolipid protein 2 [Source:HGNC Symbol;Acc:HGNC:9087]
ENSG00000128342	5.3222	2.82044	3.35139	0.00261432	0.0488405	-1.69326	LIF	LIF interleukin 6 family cytokine [Source:HGNC Symbol;Acc:HGNC:6596]
ENSG00000204767	3.25674	1.62641	3.34739	0.00264022	0.0488405	-1.84294	INSYN2B	inhibitory synaptic factor family member 2B [Source:HGNC Symbol;Acc:HGNC:37271]
ENSG00000095752	2.59019	0.701658	3.3474	0.00264017	0.0488405	-1.92881	IL11	interleukin 11 [Source:HGNC Symbol;Acc:HGNC:5966]
ENSG00000068079	2.50426	2.38066	3.35447	0.00259457	0.0488405	-1.5798	IFI35	interferon induced protein 35 [Source:HGNC Symbol;Acc:HGNC:5399]
ENSG00000235162	2.25831	0.898471	3.34755	0.00263915	0.0488405	-2.0871	C12orf75	chromosome 12 open reading frame 75 [Source:HGNC Symbol;Acc:HGNC:35164]
ENSG00000188522	2.11867	1.83799	3.34996	0.00262356	0.0488405	-1.66541	FAM83G	family with sequence similarity 83 member G [Source:HGNC Symbol;Acc:HGNC:32554]
ENSG00000171223	1.82474	1.80001	3.34981	0.00262449	0.0488405	-1.64545	JUNB	JunB proto-oncogene, AP-1 transcription factor subunit [Source:HGNC Symbol;Acc:HGNC:6205]
ENSG00000100297	1.21509	3.3352	3.3486	0.00263232	0.0488405	-1.5112	MCM5	minichromosome maintenance complex component 5 [Source:HGNC Symbol;Acc:HGNC:6948]
ENSG00000147082	-1.23151	2.88898	-3.34896	0.00263002	0.0488405	-1.52752	CCNB3	cyclin B3 [Source:HGNC Symbol;Acc:HGNC:18709]
ENSG00000161381	-1.58827	5.3652	-3.35396	0.00259781	0.0488405	-1.66053	PLXDC1	plexin domain containing 1 [Source:HGNC Symbol;Acc:HGNC:20945]
ENSG00000140470	-2.08599	1.76611	-3.35024	0.00262176	0.0488405	-1.82529	ADAMTS17	ADAM metallopeptidase with thrombospondin type 1 motif 17 [Source:HGNC Symbol;Acc:HGNC:17109]
ENSG00000163814	5.87942	0.925239	3.34555	0.00265217	0.0489585	-2.30175	CDCP1	CUB domain containing protein 1 [Source:HGNC Symbol;Acc:HGNC:24357]
ENSG00000204267	1.48632	4.45248	3.342	0.00267549	0.0492891	-1.61343	TAP2	transporter 2, ATP binding cassette subfamily B member [Source:HGNC Symbol;Acc:HGNC:44]
ENSG00000184557	4.54494	3.10486	3.34034	0.00268644	0.0493958	-1.78508	SOCS3	suppressor of cytokine signaling 3 [Source:HGNC Symbol;Acc:HGNC:19391]
ENSG00000188313	4.16022	3.88596	3.33945	0.00269231	0.0493958	-1.58798	PLSCR1	phospholipid scramblase 1 [Source:HGNC Symbol;Acc:HGNC:9092]
ENSG00000105559	2.03627	3.46016	3.3387	0.00269731	0.04942	-1.53419	PLEKHA4	pleckstrin homology domain containing A4 [Source:HGNC Symbol;Acc:HGNC:14339]
ENSG00000175505	2.45851	1.53559	3.33376	0.00273026	0.0496891	-1.76469	CLCF1	cardiotrophin like cytokine factor 1 [Source:HGNC Symbol;Acc:HGNC:17412]
ENSG00000144802	1.34192	4.45899	3.33318	0.0027342	0.0496891	-1.66608	NFKBIZ	NFKB inhibitor zeta [Source:HGNC Symbol;Acc:HGNC:29805]
ENSG00000070669	1.10355	6.44243	3.33191	0.0027427	0.0497092	-1.84738	ASNS	asparagine synthetase (glutamine-hydrolyzing) [Source:HGNC Symbol;Acc:HGNC:753]
